# Supplementary material
Source: PubMed Central journal article supplement (PMC10405350)
Supplement: NIHMS1912281-supplement-Supplementary_Tables_1-14.pdf [file NIHMS1912281-supplement-Supplementary_Tables_1-14.pdf]

# Clonal hematopoiesis and risk of chronic liver disease

## Supplementary Information

### Supplementary Tables

|                                |                                                                                               |         |
|--------------------------------|-----------------------------------------------------------------------------------------------|---------|
| <b>Supplementary Table 1.</b>  | Chronic liver disease cases and definitions in five samples                                   | Page 2  |
| <b>Supplementary Table 2.</b>  | Association of CHIP with known risk factors across study cohorts                              | Page 3  |
| <b>Supplementary Table 3.</b>  | CHIP variants ascertained through genotyping                                                  | Page 4  |
| <b>Supplementary Table 4.</b>  | Association of CHIP with prevalent and incident chronic liver disease in UK Biobank           | Page 5  |
| <b>Supplementary Table 5.</b>  | Association of CHIP and clinical risk factors with incident chronic liver disease             | Page 6  |
| <b>Supplementary Table 6.</b>  | Association of CHIP with ICD-coded chronic liver disease                                      | Page 7  |
| <b>Supplementary Table 7.</b>  | Baseline characteristics of MGB Biobank participants                                          | Page 8  |
| <b>Supplementary Table 8.</b>  | Genetic variants used for Mendelian randomization analyses                                    | Page 9  |
| <b>Supplementary Table 9.</b>  | Mendelian randomization analyses of CHIP associations with chronic liver disease              | Page 16 |
| <b>Supplementary Table 10.</b> | Phenome-wide Mendelian randomization analysis of CHIP with potential confounding risk factors | Page 17 |
| <b>Supplementary Table 11.</b> | Histologic grading criteria for steatohepatitis in mice                                       | Page 18 |
| <b>Supplementary Table 12.</b> | CHIP variants ascertained through whole-exome sequencing                                      | Page 19 |
| <b>Supplementary Table 13.</b> | STROBE-MR guidelines checklist                                                                | Page 26 |
| <b>Supplementary Table 14.</b> | TOPMed Omics Support Table                                                                    | Page 30 |

**Supplementary Table 1. Chronic liver disease cases and definitions in five samples.**

| <b>Cohort</b>                             | <b>Cases</b> | <b>Controls</b> | <b>Definition</b>                                                                                                                      | <b>Analysis</b>         |
|-------------------------------------------|--------------|-----------------|----------------------------------------------------------------------------------------------------------------------------------------|-------------------------|
| Framingham Heart Study                    | 46           | 4194            | Prevalent cirrhosis or chronic liver disease, physician-diagnosed or ICD codes K70.2, K70.3, K70.4, K74.0, K74.1, K74.2, K74.6, or I85 | Observational           |
| Atherosclerosis Risk in Communities Study | 33           | 7381            | Prevalent cirrhosis or chronic liver disease, physician-diagnosed or ICD codes K70.2, K70.3, K70.4, K74.0, K74.1, K74.2, K74.6, or I85 | Observational           |
| UK Biobank WES                            | 555          | 200,854         | Prevalent chronic liver disease, hospitalization or death due to ICD codes K70.2, K70.3, K70.4, K74.0, K74.1, K74.2, K74.6, or I85     | Observational           |
| UK Biobank Array                          | 825          | 238,491         | Incident chronic liver disease, hospitalization or death due to ICD codes K70.2, K70.3, K70.4, K74.0, K74.1, K74.2, K74.6, or I85      | Observational           |
| MGB Biobank                               | 114          | 1386            | Biopsy-diagnosed non-alcoholic steatohepatitis                                                                                         | Observational           |
| Multi-cohort GWAS <sup>20</sup>           | 5777         | 487780          | Prevalent chronic liver disease, hospitalization or death due to cirrhosis                                                             | Mendelian randomization |

WES, whole exome sequencing; MGB, Mass General Brigham; GWAS, genome-wide association study.

**Supplementary Table 2. Association of CHIP with known risk factors across cohorts.**

| <b>Risk Factor</b>                 | <b>FHS, n=4,240</b>                  | <b>ARIC, n=7,414</b>                 | <b>UK Biobank WES, n=201,409</b>     | <b>UK Biobank Array, n=239,316</b>   |
|------------------------------------|--------------------------------------|--------------------------------------|--------------------------------------|--------------------------------------|
| Age, year                          | OR 1.04<br>CI 1.03, 1.05,<br>p<0.001 | OR 1.08<br>CI 1.06, 1.10,<br>p<0.001 | OR 1.05<br>CI 1.04, 1.05,<br>p<0.001 | OR 1.04<br>CI 1.02, 1.06,<br>p<0.001 |
| Sex, female versus male            | OR 1.24<br>CI 0.98, 1.56,<br>p=0.07  | OR 1.03<br>CI 0.85, 1.25,<br>p=0.77  | OR 1.06<br>CI 1.00, 1.11,<br>p=0.04  | OR 1.37<br>CI 1.02, 1.74,<br>p=0.01  |
| Current Smoking                    | OR 1.31<br>CI 0.98, 1.78,<br>p=0.07  | OR 1.25<br>CI 1.00, 1.55,<br>p=0.05  | OR 1.34<br>CI 1.21, 1.48,<br>p<0.001 | OR 1.13<br>CI 0.74, 1.74,<br>p=0.57  |
| Body mass index, kg/m <sup>2</sup> | OR 0.96<br>CI 0.94, 0.99,<br>p=0.002 | OR 0.99<br>CI 0.97, 1.01,<br>p=0.47  | OR 1.00<br>CI 1.00, 1.01<br>p=0.27   | OR 0.99<br>CI 0.97, 1.02<br>p=0.55   |
| Type 2 Diabetes mellitus           | OR 0.96<br>CI 0.55, 1.69,<br>p=0.90  | OR 0.96<br>CI 0.68, 1.35,<br>p=0.81  | OR 0.92<br>CI 0.83, 1.03,<br>p=0.14  | OR 0.89<br>CI 0.51, 1.54,<br>p=0.67  |

Estimates were derived using multivariable logistic regression.

**Supplementary Table 3. CHIP variants ascertained through genotyping in the UK Biobank.**

| Variant      | Gene          | Chr | Location  | Reference Allele | Effect Allele | Consequence     |
|--------------|---------------|-----|-----------|------------------|---------------|-----------------|
| rs373145711  | <i>ASXL1</i>  | 20  | 31021211  | C                | T             | Arg404Ter       |
| rs373873045  | <i>DNMT3A</i> | 2   | 25459834  | C                | A             | Glu817Ter       |
| rs765045799  | <i>DNMT3A</i> | 2   | 25462086  | T                | C             | Splice Acceptor |
| rs1190050788 | <i>DNMT3A</i> | 2   | 25466765  | A                | C             | Splice Donor    |
| rs568207978  | <i>DNMT3A</i> | 2   | 25467083  | G                | A             | Arg598Ter       |
| rs369109129  | <i>DNMT3A</i> | 2   | 25469922  | G                | A             | Gln374Ter       |
| rs776841024  | <i>DNMT3A</i> | 2   | 25470556  | C                | T             | Trp306Ter       |
| rs767439400  | <i>DNMT3A</i> | 2   | 25471030  | GGGCT            | G             | SerPro243Fs     |
| rs77375493   | <i>JAK2</i>   | 9   | 5073770   | G                | T             | Val617Phe       |
| rs370735654  | <i>TET2</i>   | 4   | 106196213 | C                | T             | Arg1516Ter      |
| rs757144251  | <i>TET2</i>   | 4   | 106157271 | TA               | T             | Lys725Fs        |

Chr, chromosome; Fs, frameshift

**Supplementary Table 4. Association of CHIP<sub>≥10%</sub> with prevalent and incident chronic liver disease in UK Biobank.**

| <b>Analysis</b> | <b>Cases</b> | <b>Controls</b> | <b>OR</b>          | <b>P-value</b> |
|-----------------|--------------|-----------------|--------------------|----------------|
| Prevalent CLD   | 247          | 199,881         | 1.16 CI 0.61, 2.20 | 0.63           |
| Incident CLD    | 555          | 200,854         | 1.61 CI 1.07, 2.41 | 0.02           |

CLD, chronic liver disease

**Supplementary Table 5. Association of CHIP and clinical risk factors with incident chronic liver disease.**

| <b>Risk factor</b>           | <b>Hazard Ratio for incident chronic liver disease</b> | <b>P-value</b>        |
|------------------------------|--------------------------------------------------------|-----------------------|
| CHIP                         | 1.54 CI 1.05, 2.28                                     | 0.02                  |
| Age, per 10 years            | 1.24 CI 1.09, 1.39                                     | $5 \times 10^{-4}$    |
| BMI, per 5 kg/m <sup>2</sup> | 1.23 CI 1.14, 1.34                                     | $5 \times 10^{-7}$    |
| Type 2 diabetes              | 6.21 CI 5.06, 7.63                                     | $< 2 \times 10^{-16}$ |
| Current smoking              | 1.94 CI 1.50, 2.51                                     | $5 \times 10^{-7}$    |

Hazard ratios for risk factors were derived in a Cox proportional hazard model with mutual adjustment for CHIP, age more than six years, body mass index  $> 30 \text{ kg/m}^2$ , type 2 diabetes, current smoking, and sex. BMI, body mass index

**Supplementary Table 6. Association of CHIP with ICD-coded chronic liver disease.**

| <b>Outcome</b>              | <b>Codes</b>                  | <b>Cases</b> | <b>Controls</b> | <b>Effect</b>            | <b>P-value</b> |
|-----------------------------|-------------------------------|--------------|-----------------|--------------------------|----------------|
| Alcoholic liver disease     | K70.2, K70.3, K70.4           | 535          | 199,593         | OR 1.70 CI<br>0.98, 2.96 | 0.06           |
| Non-alcoholic liver disease | K74.0, K74.1,<br>K74.2, K74.6 | 707          | 199,421         | OR 1.78 CI<br>1.23, 2.57 | 0.002          |
| Fatty liver                 | K76.0                         | 1,920        | 198,208         | OR 0.96 CI<br>0.71, 1.32 | 0.80           |
| Cirrhosis                   | K70.3, K74.6, I85             | 787          | 199,341         | OR 1.64 CI<br>1.03, 2.61 | 0.04           |

Estimates were derived using logistic regression with adjustment for age, sex, type 2 diabetes and current smoking.

**Supplementary Table 7. Baseline characteristics of MGB Biobank participants.**

|                                              | <b>Controls (n=1368)</b> | <b>NASH on biopsy (n=114)</b> |
|----------------------------------------------|--------------------------|-------------------------------|
| Age, mean (SD) years                         | 54 (12)                  | 54 (12)                       |
| Female sex, n (%)                            | 804 (59%)                | 67 (59%)                      |
| Body mass index, mean (SD) kg/m <sup>2</sup> | 31 (8)                   | 31 (9)                        |
| Type 2 diabetes, n(%)                        | 228 (17%)                | 19 (17%)                      |
| Weekly alcoholic drinks, mean (SD)           | 3 (7)                    | 4 (8)                         |

MGB, Mass General Brigham; NASH, nonalcoholic steatohepatitis; SD, standard deviation

**Supplementary Table 8. Genetic variants used for Mendelian randomization analyses.**

| SNP         | CHR   | POS       | Effect<br>_allele | CHIP.Beta  | CHIP.SE    | Cirrhosis<br>.Beta | Cirrhosis<br>.SE | pval.het   |
|-------------|-------|-----------|-------------------|------------|------------|--------------------|------------------|------------|
| rs7705526   | chr5  | 1285859   | A                 | 0.26256577 | 0.02572599 | -0.0238            | 0.0288           | 0.23183947 |
| rs58322641  | chr3  | 160497760 | C                 | 0.14209986 | 0.02334552 | 0.0142             | 0.0251           | 0.72615368 |
| rs9520550   | chr13 | 107684706 | G                 | -0.2011417 | 0.03750183 | -0.0299            | 0.05             | 0.65651629 |
| rs13250317  | chr8  | 135993012 | G                 | 0.13128256 | 0.02610216 | 0.0066             | 0.0274           | 0.95457943 |
| rs7636946   | chr3  | 166887539 | C                 | -0.1506791 | 0.03094269 | 0.01               | 0.0303           | 0.60054582 |
| rs112963793 | chr14 | 55099311  | C                 | 0.54699644 | 0.11332264 | -0.0475            | 0.1175           | 0.55815756 |
| rs154978    | chr6  | 32931519  | T                 | -0.1109292 | 0.02315176 | 0.0278             | 0.025            | 0.19798189 |
| rs28637066  | chr17 | 76249356  | C                 | 0.11165055 | 0.02353426 | -0.0342            | 0.025            | 0.12223427 |
| rs2538478   | chr7  | 148513385 | T                 | 0.1141746  | 0.02414857 | 0.0432             | 0.0278           | 0.16135139 |
| rs71574228  | chr6  | 107092319 | A                 | -0.2048133 | 0.04335864 | 0.0096             | 0.0569           | 0.75821714 |
| rs11648858  | chr16 | 85798686  | G                 | -0.2037944 | 0.04344019 | 0.0167             | 0.0559           | 0.65995317 |
| rs6510126   | chr19 | 58164549  | T                 | -0.1403395 | 0.03040669 | 0.0322             | 0.0321           | 0.23983917 |
| rs7949595   | chr11 | 79935819  | T                 | 0.36800491 | 0.0800441  | 0.1413             | 0.0694           | 0.06548094 |
| rs2388989   | chr12 | 32337341  | A                 | -0.1266603 | 0.02762878 | 0.0143             | 0.0304           | 0.52698971 |
| rs1968864   | chr15 | 93309389  | A                 | 0.1344106  | 0.02935602 | -0.0161            | 0.0327           | 0.51412927 |
| rs9499858   | chr6  | 104406121 | C                 | 0.13170943 | 0.02877552 | -0.019             | 0.0318           | 0.44777242 |
| rs113554316 | chr20 | 13589476  | G                 | 0.48295832 | 0.10562186 | 0.0957             | 0.2315           | 0.73877523 |
| rs10994735  | chr10 | 61354476  | C                 | -0.1253714 | 0.02747721 | -0.0103            | 0.0282           | 0.84532209 |
| rs1963791   | chr7  | 24546024  | C                 | -0.1353832 | 0.02978164 | -0.0391            | 0.0345           | 0.32444966 |
| rs12897081  | chr14 | 76845130  | T                 | -0.1831918 | 0.0407624  | -0.0266            | 0.043            | 0.64809448 |
| rs17705912  | chr3  | 8244077   | G                 | 0.20461226 | 0.04556538 | 0.0518             | 0.0555           | 0.42739561 |
| rs592236    | chr6  | 140855084 | C                 | 0.19457058 | 0.0433567  | 0.0495             | 0.0405           | 0.29736958 |
| rs57538453  | chr16 | 86960750  | C                 | 0.25814129 | 0.05774208 | 0.0728             | 0.0863           | 0.46549816 |
| rs74055946  | chr12 | 3641529   | A                 | -0.1705324 | 0.03819864 | -0.0032            | 0.0464           | 0.94221568 |

|             |       |           |   |            |            |           |        |            |
|-------------|-------|-----------|---|------------|------------|-----------|--------|------------|
| rs2585780   | chr11 | 19954773  | T | -0.113483  | 0.02547936 | 0.0147    | 0.0283 | 0.49928726 |
| rs2618613   | chr20 | 17815547  | G | 0.11489059 | 0.02584519 | 0.0174    | 0.0258 | 0.61346131 |
| rs77331144  | chr4  | 28536689  | A | 0.20125111 | 0.04533759 | 0.0162    | 0.0694 | 0.90277244 |
| rs2967322   | chr16 | 82268774  | T | 0.13622168 | 0.03070137 | -0.0172   | 0.0337 | 0.50425557 |
| rs72860429  | chr11 | 15255188  | C | 0.31256012 | 0.07046951 | 0.0459    | 0.063  | 0.58893556 |
| rs2079661   | chr6  | 105447965 | T | -0.1349513 | 0.03049917 | -0.0323   | 0.0331 | 0.41125343 |
| rs4241744   | chr4  | 182236160 | A | -0.1964009 | 0.04440433 | 9.00E-04  | 0.0572 | 0.88231159 |
| rs4835780   | chr5  | 138343624 | C | 0.10444837 | 0.02367116 | 0.0306    | 0.0258 | 0.30131111 |
| rs1052432   | chr5  | 177137188 | A | 0.14144794 | 0.03207036 | -0.0093   | 0.0356 | 0.67800299 |
| rs9954262   | chr18 | 52296429  | C | -0.1791186 | 0.04071978 | 0.0394    | 0.0413 | 0.26072508 |
| rs143835086 | chr15 | 101528199 | T | 0.7521186  | 0.17111201 | -0.1932   | 0.1952 | 0.25385246 |
| rs76964416  | chr5  | 142146989 | G | 0.33922682 | 0.07719557 | 0.2532    | 0.0745 | 0.00121103 |
| rs10044384  | chr5  | 25481466  | G | 0.12244664 | 0.02792222 | 0.0155    | 0.0305 | 0.72261817 |
| rs62353215  | chr4  | 166856860 | C | 0.28071111 | 0.06428828 | 0.0136    | 0.0757 | 0.97030951 |
| rs6064151   | chr20 | 55018501  | A | 0.21150262 | 0.04845254 | 0.0608    | 0.0454 | 0.24405881 |
| rs150778589 | chr4  | 158933035 | A | 0.43262624 | 0.09912134 | -7.00E-04 | 0.105  | 0.86849841 |
| rs2363947   | chr3  | 126568597 | A | -0.1273962 | 0.02919676 | -0.0049   | 0.0323 | 0.99991929 |
| rs74255875  | chr19 | 51404849  | T | 0.14871067 | 0.03417559 | 0.0306    | 0.0348 | 0.47305137 |
| rs142644661 | chr11 | 133736472 | A | 1.22382938 | 0.28144091 | -0.2305   | 0.4102 | 0.49794145 |
| rs146378626 | chr5  | 39172625  | A | 1.61077172 | 0.37060471 | 0.2819    | 0.4023 | 0.58336465 |
| rs2159912   | chr14 | 90386317  | C | 0.14432608 | 0.03324981 | 0.0067    | 0.0396 | 0.97672344 |
| rs8108135   | chr19 | 53485191  | T | 0.10106876 | 0.02329939 | -0.0155   | 0.0269 | 0.46996064 |
| rs17865343  | chr4  | 117351922 | A | -0.173088  | 0.03991053 | 0.0135    | 0.0429 | 0.63749052 |
| rs11064570  | chr12 | 851177    | G | -0.1486108 | 0.03427246 | -0.0017   | 0.0332 | 0.90344866 |
| rs75144663  | chr2  | 215905462 | T | 0.3191598  | 0.07384028 | -0.0153   | 0.0847 | 0.74416337 |
| rs116482203 | chr5  | 91033697  | G | 0.54407045 | 0.12589004 | -0.0195   | 0.1278 | 0.75101673 |
| rs57547130  | chr2  | 189047645 | G | -0.1406853 | 0.03263725 | 0.0123    | 0.0355 | 0.61687636 |

|             |       |           |   |            |            |           |        |            |
|-------------|-------|-----------|---|------------|------------|-----------|--------|------------|
| rs1011905   | chr6  | 34241739  | T | 0.18821351 | 0.04369006 | -6.00E-04 | 0.0518 | 0.87948706 |
| rs56205841  | chr4  | 55179348  | T | 0.22012098 | 0.05144805 | 0.0291    | 0.0562 | 0.71264334 |
| rs117843939 | chr7  | 15035342  | G | 0.33516226 | 0.07837845 | 0.0576    | 0.0803 | 0.57635966 |
| rs4778799   | chr15 | 80484358  | A | 0.11467422 | 0.02687444 | -0.0422   | 0.0295 | 0.11309632 |
| rs77068362  | chr10 | 7999435   | G | -0.2121526 | 0.04979263 | -0.1601   | 0.1249 | 0.2235293  |
| rs11127654  | chr3  | 79663831  | C | 0.10845305 | 0.02549993 | 0.0358    | 0.0267 | 0.23468166 |
| rs72873061  | chr3  | 60994629  | C | 0.29194572 | 0.06864904 | 0.1081    | 0.1246 | 0.43638108 |
| rs118083311 | chr1  | 87128705  | T | 0.30956454 | 0.07281472 | 0.0308    | 0.0762 | 0.80349973 |
| rs148795020 | chr16 | 77329939  | A | 1.33020752 | 0.31313131 | -0.128    | 0.4229 | 0.67130087 |
| rs141473570 | chr8  | 22763037  | T | 1.04299003 | 0.24610628 | 0.3676    | 0.226  | 0.14567061 |
| rs4961467   | chr9  | 16229249  | T | 0.10679923 | 0.02525512 | 0.0238    | 0.0257 | 0.44198901 |
| rs140919813 | chr11 | 127696291 | T | 0.43271319 | 0.10235938 | 0.2642    | 0.1099 | 0.02386761 |
| rs151165594 | chr10 | 3629297   | G | 0.31023936 | 0.07374134 | -0.0298   | 0.0756 | 0.57980563 |
| rs4814402   | chr20 | 236640    | A | 0.10050288 | 0.02390093 | 0.0352    | 0.0253 | 0.21412458 |
| rs6595950   | chr5  | 130505172 | G | -0.1980934 | 0.04711747 | 0.0926    | 0.0981 | 0.30662267 |
| rs9900036   | chr17 | 4835866   | G | 0.10128079 | 0.02413117 | 0.0145    | 0.0263 | 0.6858902  |
| rs6983251   | chr8  | 124020363 | T | -0.0983436 | 0.02345442 | 0.0133    | 0.0267 | 0.5213026  |
| rs11742154  | chr5  | 168186539 | G | -0.1096793 | 0.02615845 | 0.0314    | 0.0257 | 0.1643487  |
| rs12497942  | chr3  | 14344401  | A | 0.15642605 | 0.03732514 | 0.0016    | 0.0392 | 0.91010686 |
| rs73762686  | chr5  | 74300470  | T | -0.1571639 | 0.03750286 | -0.011    | 0.0428 | 0.9075251  |
| rs12451733  | chr17 | 974413    | T | 0.14560123 | 0.03478938 | 0.0187    | 0.0456 | 0.77341591 |
| rs11822751  | chr11 | 26573092  | T | -0.2556086 | 0.06108122 | 0.2279    | 0.1222 | 0.05153757 |
| rs76174129  | chr16 | 79727458  | G | -0.3856515 | 0.09248725 | -0.0261   | 0.1146 | 0.92144772 |
| rs1353341   | chr1  | 4312932   | A | 0.17386636 | 0.04177042 | 0.0711    | 0.049  | 0.18758567 |
| rs1077878   | chr2  | 2718084   | A | -0.1065204 | 0.02559181 | 0.0511    | 0.0286 | 0.05299995 |
| rs2445304   | chr11 | 5017286   | G | 0.09653849 | 0.02324722 | -0.0159   | 0.025  | 0.43149655 |
| rs6584278   | chr10 | 99518342  | T | 0.09906691 | 0.02389262 | -0.0234   | 0.0257 | 0.28839962 |

|             |       |           |   |            |            |           |        |            |
|-------------|-------|-----------|---|------------|------------|-----------|--------|------------|
| rs7555835   | chr1  | 164668543 | T | 0.30988711 | 0.07474407 | 0.0631    | 0.0999 | 0.60772081 |
| rs2281566   | chr20 | 63261160  | A | -0.1028816 | 0.02481862 | -0.0204   | 0.0295 | 0.57632977 |
| rs335407    | chr6  | 155344307 | T | -0.2510662 | 0.06063142 | 0.063     | 0.0737 | 0.32319531 |
| rs78801578  | chr17 | 2086134   | C | 0.18926252 | 0.04571514 | 0.0095    | 0.045  | 0.96042828 |
| rs6869328   | chr5  | 81085345  | C | 0.16815796 | 0.04062679 | 0.038     | 0.0461 | 0.49283589 |
| rs10732707  | chr10 | 132880491 | A | -0.0969731 | 0.02343134 | 0.0193    | 0.0273 | 0.39783173 |
| rs10118399  | chr9  | 71481590  | G | 0.11461873 | 0.0277175  | 0.1073    | 0.0343 | 0.00264579 |
| rs10095665  | chr8  | 6333439   | G | 0.12843788 | 0.03106594 | 0.0246    | 0.0342 | 0.56429251 |
| rs73594788  | chr11 | 121386774 | C | -0.1961537 | 0.04747648 | -0.1297   | 0.0917 | 0.18242637 |
| rs2661384   | chr3  | 21331417  | A | 0.12153072 | 0.02943797 | -0.0233   | 0.029  | 0.33318145 |
| rs1441470   | chr2  | 140665747 | C | -0.1254065 | 0.03037792 | 0.0108    | 0.0378 | 0.67880692 |
| rs17007563  | chr2  | 71884812  | T | -0.1909729 | 0.04635323 | 0.0117    | 0.0675 | 0.77755565 |
| rs7795417   | chr7  | 11831085  | A | 0.11140423 | 0.0271337  | -0.0185   | 0.0275 | 0.40597101 |
| rs9613021   | chr22 | 25786592  | T | -0.1016146 | 0.02477397 | 0.0017    | 0.0274 | 0.83747766 |
| rs72858963  | chr2  | 129709273 | A | 0.21997493 | 0.05366024 | 0.0684    | 0.0631 | 0.34100907 |
| rs745098    | chr5  | 68764409  | C | 0.14566353 | 0.03555132 | 0.0029    | 0.0444 | 0.95143166 |
| rs61783495  | chr1  | 99324370  | A | 0.11466031 | 0.02799376 | 0.0063    | 0.028  | 0.94593406 |
| rs75584603  | chr7  | 27225099  | C | 0.36347976 | 0.08875512 | 0.0849    | 0.0915 | 0.43687116 |
| rs61183515  | chr15 | 54883424  | C | 0.12364042 | 0.03019452 | -0.0404   | 0.0321 | 0.15837635 |
| rs116868446 | chr11 | 114762354 | C | 0.24714239 | 0.06052222 | 0.0082    | 0.0628 | 0.98344331 |
| rs17006345  | chr1  | 219691632 | G | 0.23878031 | 0.05849909 | -0.0932   | 0.0644 | 0.11097123 |
| rs927330    | chr6  | 135810618 | T | 0.10034721 | 0.02459353 | 0.0108    | 0.0273 | 0.79874761 |
| rs138533438 | chr12 | 15617615  | T | 0.87849461 | 0.21542652 | -0.0349   | 0.5778 | 0.90535976 |
| rs7184533   | chr16 | 60712423  | G | 0.16327066 | 0.04003906 | -5.00E-04 | 0.0742 | 0.92717534 |
| rs74767296  | chr3  | 156629610 | A | 0.29218115 | 0.07173552 | 0.1785    | 0.0681 | 0.01371008 |
| rs12436948  | chr14 | 22140460  | C | 0.11060075 | 0.02719819 | 0.0327    | 0.0296 | 0.33522646 |
| rs4470166   | chr16 | 62197815  | T | -0.1065662 | 0.02621698 | -0.0093   | 0.0281 | 0.85268415 |

|             |       |           |   |            |            |         |        |            |
|-------------|-------|-----------|---|------------|------------|---------|--------|------------|
| rs56243125  | chr12 | 30963552  | T | 0.14466982 | 0.0355951  | -0.0051 | 0.0342 | 0.75445589 |
| rs8108710   | chr19 | 2745531   | G | 0.1061049  | 0.02614214 | -0.0084 | 0.0314 | 0.69044186 |
| rs11264048  | chr1  | 37436514  | G | 0.09544665 | 0.02351665 | -0.0288 | 0.0251 | 0.19459604 |
| rs73239895  | chr17 | 7050239   | T | -0.264467  | 0.06516789 | 0.0658  | 0.1418 | 0.59190862 |
| rs62167014  | chr2  | 120690646 | A | 0.15984553 | 0.03940261 | 0.0066  | 0.0515 | 0.99292253 |
| rs2049553   | chr2  | 52460568  | A | 0.11179721 | 0.02756533 | 0.0197  | 0.0299 | 0.6055028  |
| rs72912392  | chr18 | 47879275  | G | 0.72398365 | 0.17859821 | 0.1743  | 0.1722 | 0.39341969 |
| rs1925919   | chr6  | 6878657   | A | 0.10259714 | 0.02533435 | 0.0044  | 0.0258 | 0.9858422  |
| rs76566774  | chr17 | 70966776  | G | 0.15514036 | 0.03831688 | 0.0282  | 0.0378 | 0.55509201 |
| rs7011923   | chr8  | 106201761 | G | 0.10499014 | 0.0259317  | 0.044   | 0.0286 | 0.16124072 |
| rs1279331   | chr14 | 33106688  | T | 0.09588521 | 0.02368546 | -0.0252 | 0.0251 | 0.24850547 |
| rs139897249 | chr12 | 60096759  | A | 0.65867769 | 0.16283752 | 0.3217  | 0.1357 | 0.02824747 |
| rs1050909   | chr8  | 469368    | T | -0.1021671 | 0.02526079 | 0.013   | 0.028  | 0.54447893 |
| rs55746901  | chr6  | 152198774 | C | -0.1520812 | 0.03761363 | 0.006   | 0.0526 | 0.82154726 |
| rs247829    | chr16 | 84548514  | C | 0.1072712  | 0.0265419  | 0.0164  | 0.027  | 0.64835336 |
| rs144565704 | chr13 | 28862556  | C | 0.41042574 | 0.10157898 | 0.08    | 0.105  | 0.53959569 |
| rs11611740  | chr12 | 90923067  | T | -0.1227043 | 0.03038545 | -0.031  | 0.0291 | 0.36480415 |
| rs10816846  | chr9  | 109646263 | C | 0.14477809 | 0.0358563  | 0.0037  | 0.035  | 0.95737049 |
| rs77519543  | chr6  | 69830497  | A | 0.40655384 | 0.10069489 | 0.1766  | 0.0864 | 0.06135683 |
| rs6100832   | chr20 | 60250439  | A | -0.2902106 | 0.07190905 | -0.1525 | 0.1346 | 0.29324442 |
| rs10969441  | chr9  | 29900227  | A | 0.16522827 | 0.04097691 | 0.0722  | 0.0565 | 0.24306988 |
| rs11659919  | chr18 | 78156222  | A | 0.09435645 | 0.02342511 | -0.0119 | 0.0253 | 0.53834528 |
| rs11897424  | chr2  | 11016153  | C | -0.0951714 | 0.02363728 | -0.0382 | 0.0254 | 0.17271931 |
| rs78039770  | chr12 | 109362380 | T | 0.45708991 | 0.11357504 | 0       | 0.1459 | 0.90397439 |
| rs10179302  | chr2  | 39354518  | C | 0.12679484 | 0.0315122  | 0.074   | 0.0404 | 0.08648758 |
| rs10268214  | chr7  | 46285920  | C | 0.12002075 | 0.02983476 | -0.0106 | 0.0352 | 0.66491178 |
| rs73016184  | chr6  | 147737833 | G | -0.1300987 | 0.03237578 | -0.0157 | 0.0383 | 0.77950457 |

|             |       |           |   |            |            |           |        |            |
|-------------|-------|-----------|---|------------|------------|-----------|--------|------------|
| rs58028036  | chr19 | 16034613  | G | -0.2053458 | 0.0511444  | -0.0417   | 0.09   | 0.70691513 |
| rs11621256  | chr14 | 98955293  | T | 0.10873479 | 0.02708657 | -0.0204   | 0.0297 | 0.40671806 |
| rs55774549  | chr7  | 89231067  | G | -0.1022214 | 0.02547321 | -0.0159   | 0.0273 | 0.66018748 |
| rs73244753  | chr5  | 113220707 | G | -0.1534509 | 0.0382476  | -0.0269   | 0.0515 | 0.68291863 |
| rs62079882  | chr18 | 10130589  | G | -0.1235745 | 0.03082083 | 0.0175    | 0.0309 | 0.47015114 |
| rs150150078 | chr2  | 46679261  | C | 0.3810169  | 0.09505278 | 0.0146    | 0.119  | 0.99969641 |
| rs4971548   | chr2  | 20697776  | G | -0.1420598 | 0.0354449  | 0.0042    | 0.0412 | 0.81420835 |
| rs61932730  | chr12 | 74533902  | C | 0.13551742 | 0.03386732 | -0.0525   | 0.0363 | 0.11094588 |
| rs7104475   | chr11 | 81781607  | C | -0.0941108 | 0.02353658 | -0.0228   | 0.025  | 0.44168136 |
| rs2239206   | chr12 | 120238287 | A | 0.09952729 | 0.0248933  | -0.0147   | 0.025  | 0.45733753 |
| rs3905902   | chr3  | 11984305  | A | 0.13722115 | 0.03436621 | 0.0218    | 0.0495 | 0.73812765 |
| rs4935413   | chr10 | 53276387  | C | 0.2228026  | 0.05582528 | -0.1144   | 0.0865 | 0.15464252 |
| rs8001898   | chr13 | 44032411  | T | 0.10057805 | 0.02522597 | 0.0173    | 0.0283 | 0.63419363 |
| rs140481838 | chr1  | 176898177 | A | -0.3442444 | 0.0863649  | -0.0903   | 0.0884 | 0.38195101 |
| rs10997266  | chr10 | 66626827  | T | 0.09402046 | 0.02359735 | -9.00E-04 | 0.0256 | 0.85968763 |
| rs111400910 | chr1  | 157843742 | A | 0.558159   | 0.14010689 | 0.1688    | 0.1664 | 0.3748795  |
| rs1144986   | chr5  | 147883415 | G | 0.10897161 | 0.02736483 | 0.0416    | 0.0271 | 0.16614146 |
| rs6569619   | chr6  | 129676740 | G | 0.09337452 | 0.02346818 | -0.0551   | 0.0252 | 0.01954545 |
| rs11973042  | chr7  | 13489838  | A | -0.1215159 | 0.03055876 | 0.0111    | 0.0403 | 0.69505582 |
| rs10144740  | chr14 | 43794338  | A | 0.09376311 | 0.02359145 | 0.0304    | 0.0252 | 0.28637369 |
| rs55823910  | chr1  | 246683479 | G | 0.10841938 | 0.02728156 | -0.009    | 0.0294 | 0.65341937 |
| rs55641075  | chr5  | 89781846  | T | 0.10959336 | 0.02757704 | 0.0075    | 0.0271 | 0.90314757 |
| rs140804866 | chr8  | 62039202  | G | 0.3899505  | 0.0981827  | 0.0072    | 0.099  | 0.93710994 |
| rs10745289  | chr10 | 48926221  | T | -0.0958245 | 0.0241571  | 0.0494    | 0.0256 | 0.03761338 |
| rs141515873 | chr10 | 11142567  | T | 0.2171518  | 0.05475507 | 0.1011    | 0.0602 | 0.12245925 |
| rs71632376  | chr1  | 168699771 | T | 0.34264556 | 0.08641107 | -0.0161   | 0.0739 | 0.6908591  |
| rs2187416   | chr18 | 54975128  | A | -0.1120015 | 0.02826269 | 0.0308    | 0.028  | 0.20855944 |

|             |       |           |   |            |            |         |        |            |
|-------------|-------|-----------|---|------------|------------|---------|--------|------------|
| rs61957178  | chr13 | 73421057  | T | -0.1196143 | 0.03018385 | -0.0151 | 0.0337 | 0.75474927 |
| rs1023780   | chr15 | 98289869  | T | -0.1317882 | 0.03327313 | 0.0047  | 0.0358 | 0.78448571 |
| rs116993813 | chr14 | 80680034  | A | 0.39817787 | 0.10063233 | -0.1509 | 0.1131 | 0.14075843 |
| rs145475731 | chr4  | 8074008   | T | -0.2311921 | 0.05857881 | 0.0352  | 0.0584 | 0.44896839 |
| rs1294715   | chr20 | 5828048   | G | -0.1166582 | 0.02956472 | 0.0255  | 0.0315 | 0.33991386 |
| rs7801635   | chr7  | 57537269  | G | 0.12537764 | 0.03180371 | -0.0093 | 0.0308 | 0.64562534 |
| rs7420256   | chr2  | 240228496 | G | -0.1017626 | 0.02582147 | 0.0033  | 0.0292 | 0.80449553 |
| rs72679932  | chr1  | 110535007 | G | 0.14306241 | 0.03632385 | -0.0136 | 0.0389 | 0.62255897 |
| rs878035    | chr13 | 106426937 | A | 0.21888415 | 0.05558832 | -0.0047 | 0.054  | 0.80754718 |
| rs4725269   | chr7  | 10320787  | T | -0.0927101 | 0.0235648  | 0.0244  | 0.025  | 0.26209989 |
| rs2696141   | chr9  | 130878712 | A | 0.13318501 | 0.03387357 | -0.0681 | 0.0418 | 0.07925806 |
| rs12293674  | chr11 | 130834614 | C | -0.2121921 | 0.05398677 | 0.0245  | 0.0719 | 0.64915804 |
| rs3058639   | chr20 | 19486199  | C | 0.10337832 | 0.02630492 | -0.0263 | 0.0282 | 0.28181481 |
| rs17736652  | chr2  | 146260968 | G | -0.1213052 | 0.03087225 | -0.0648 | 0.0321 | 0.06031481 |
| rs60256580  | chr12 | 92447211  | C | -0.1631152 | 0.0415454  | -0.1192 | 0.0579 | 0.05077788 |
| rs10842580  | chr12 | 25560368  | A | -0.1214582 | 0.03094027 | -0.056  | 0.1113 | 0.64458149 |
| rs7032591   | chr9  | 78318642  | C | -0.0958795 | 0.0244386  | -0.0083 | 0.0252 | 0.85431019 |
| rs12757342  | chr1  | 3292266   | G | -0.2093941 | 0.05340236 | 0.0282  | 0.0546 | 0.50558103 |
| rs6935498   | chr6  | 115404482 | G | -0.1856988 | 0.04736146 | 0.1059  | 0.0625 | 0.07004635 |
| rs28856324  | chr1  | 81247214  | C | -0.1751792 | 0.04469831 | 0.07    | 0.0532 | 0.14837249 |
| rs2328868   | chr6  | 25212672  | T | -0.190212  | 0.04853889 | 0.0309  | 0.116  | 0.7417223  |
| rs11041877  | chr11 | 8318306   | A | -0.0912097 | 0.02327609 | -0.0187 | 0.0251 | 0.54394876 |
| rs499827    | chr20 | 3623800   | G | -0.1164606 | 0.0297258  | 0.0777  | 0.0298 | 0.00568278 |
| rs77825133  | chr5  | 94705888  | C | 0.42631139 | 0.10885621 | -0.1997 | 0.1218 | 0.07537035 |
| rs744877    | chr1  | 145720709 | A | -0.0917231 | 0.02342217 | -0.011  | 0.0253 | 0.7671047  |

**Supplementary Table 9. Mendelian randomization analyses of CHIP associations with chronic liver disease.**

| <b>Mendelian randomization analysis</b> | <b>P-value threshold to select variants</b> | <b>Number of Variants</b> | <b>OR (95% CI)</b> | <b>p-value</b>     | <b>P-heterogeneity</b> |
|-----------------------------------------|---------------------------------------------|---------------------------|--------------------|--------------------|------------------------|
| Observational                           | NA                                          | NA                        | 2.59 (1.65, 4.05)  | 3x10 <sup>-5</sup> | NA                     |
| MR-RAPS, primary analysis               | p<0.0001                                    | 184                       | 2.37 (1.57, 3.6)   | 4x10 <sup>-5</sup> | 0.37                   |
| MR-RAPS                                 | p<0.001                                     | 824                       | 2.05 (1.44, 2.91)  | 6x10 <sup>-5</sup> | 0.83                   |
| MR-RAPS                                 | p<0.00005                                   | 90                        | 2.34 (0.97, 5.67)  | 0.06               | 0.87                   |
| MR-RAPS excluding pleiotropic SNPs      | p<0.00005                                   | 63                        | 4.2 (1.14, 15.4)   | 0.03               | 0.56                   |
| IVW                                     | p<0.0001                                    | 184                       | 2.44 (1.29, 4.61)  | 0.007              | 0.44                   |
| MR-Egger                                | p<0.0001                                    | 184                       | 20.4 (4.04, 103)   | 0.0004             | 0.008                  |
| MR-PRESSO                               | p<0.0001                                    | 184                       | 2.45 (1.3, 4.59)   | 0.006              | 0.49                   |
| Multivariate IVW                        | p<0.0001                                    | 184                       | 2.56 (1.41, 4.63)  | 0.002              | 0.08                   |
| IVW                                     | p<0.00005                                   | 90                        | 2.25 (0.985, 5.14) | 0.06               | 0.45                   |
| MR-Egger                                | p<0.00005                                   | 90                        | 11.2 (1.38, 91.4)  | 0.02               | 0.11                   |
| MR-PRESSO                               | p<0.00005                                   | 90                        | 2.25 (0.996, 5.08) | 0.05               | 0.631                  |
| Median regression MR                    | p<0.0001                                    | 184                       | 1.79 (0.89, 3.61)  | 0.1                | 0.52                   |

Number of variants refers to the number of SNPs used in the Mendelian randomization score. IVW, inverse variance weighted regression; MR, Mendelian randomization; MR-RAPS, Mendelian randomization with adjusted profile score; MR-PRESSO, Mendelian randomization Pleiotropy RESidual Sum and Outlier

**Supplementary Table 10. Phenome-wide Mendelian randomization analysis of CHIP with potential confounding risk factors.**

| <b>Outcome</b>                          | <b>N</b>                          | <b>Effect (CI), SD</b> | <b>P-value</b> |
|-----------------------------------------|-----------------------------------|------------------------|----------------|
| Type 2 diabetes                         | 62,892 cases,<br>596,424 controls | -0.09 (-0.46 , 0.29)   | 0.66           |
| Glycated hemoglobin                     | 146806                            | 0.07 (0.02 , 0.12)     | 0.004          |
| Total cholesterol                       | 187365                            | -0.08 (-0.34 , 0.17)   | 0.54           |
| HDL cholesterol                         | 403943                            | -0.06 (-0.17 , 0.05)   | 0.28           |
| LDL cholesterol                         | 440546                            | -0.02 (-0.11 , 0.07)   | 0.69           |
| Triglycerides                           | 441016                            | -0.03 (-0.11 , 0.05)   | 0.45           |
| C-Reactive protein                      | 204402                            | -0.05 (-0.21 , 0.12)   | 0.57           |
| Systolic blood pressure                 | 757601                            | -0.03 (-1.64 , 1.58)   | 0.47           |
| Diastolic blood pressure                | 757601                            | -0.03 (-0.97 , 0.91)   | 0.53           |
| Body mass index                         | 681275                            | 0.06 (-0.09 , 0.21)    | 0.42           |
| Current tobacco smoking,<br>categorical | 337030                            | 0.03 (-0.02 , 0.08)    | 0.20           |
| Current alcohol use                     | 23807 cases,<br>360726 controls   | 1.01 (0.98 , 1.03)     | 0.61           |

MR analysis was performed using MR Base platform. Estimates were derived using inverse variance weighted meta-analysis using 90 independent variants associated with CHIP with  $p < 5 \times 10^{-5}$ .

**Supplementary Table 11. Histologic grading criteria for steatohepatitis in mice.**

|                                                  |                                                                               |
|--------------------------------------------------|-------------------------------------------------------------------------------|
| <b><i>Steatosis</i></b>                          |                                                                               |
| Grade 0                                          | Absent                                                                        |
| Grade 1                                          | < 33% of hepatocytes                                                          |
| Grade 2                                          | 33-66% of hepatocytes                                                         |
| Grade 3                                          | > 66% of hepatocytes                                                          |
| <b><i>Inflammation</i></b>                       |                                                                               |
| Grade 0                                          | Absent                                                                        |
| Grade 1                                          | < 100 inflammatory cells per focus or < 3 inflammatory foci per 20x field     |
| Grade 2                                          | 100-500 inflammatory cells per focus or 3 - 4 inflammatory foci per 20x field |
| Grade 3                                          | > 500 inflammatory cells per focus or > 5 inflammatory foci per 20x field     |
| <b><i>Hepatocyte Injury/Ballooning</i></b>       |                                                                               |
| Grade 0                                          | Absent                                                                        |
| Grade 1                                          | Rare balloon cells                                                            |
| Grade 2                                          | Widespread hepatocyte ballooning and apoptosis                                |
| <b><i>Modified NASH activity score (NAS)</i></b> |                                                                               |
| Grade 1                                          | 0-2 points                                                                    |
| Grade 2                                          | 3-4 points                                                                    |
| Grade 3                                          | > 5 points                                                                    |

Modified from NASH Clinical Research Network scoring system for NAFLD<sup>35</sup>.

**Supplementary Table 12. CHIP variants ascertained through whole-exome sequencing.**

| <b>Gene name</b> | <b>Reported mutations used for variant calling</b>                                                                                                                                                                                                                                                                                                                                | <b>Accession</b> |
|------------------|-----------------------------------------------------------------------------------------------------------------------------------------------------------------------------------------------------------------------------------------------------------------------------------------------------------------------------------------------------------------------------------|------------------|
| <i>ASXL1</i>     | Frameshift/nonsense/splice-site in exon 11-12                                                                                                                                                                                                                                                                                                                                     | NM_015338        |
| <i>ASXL2</i>     | Frameshift/nonsense/splice-site in exon 11-12                                                                                                                                                                                                                                                                                                                                     | NM_018263        |
| <i>BCOR</i>      | Frameshift/nonsense/splice-site                                                                                                                                                                                                                                                                                                                                                   | NM_001123385     |
| <i>BCORL1</i>    | Frameshift/nonsense/splice-site                                                                                                                                                                                                                                                                                                                                                   | NM_021946        |
| <i>BRAF</i>      | G464E, G464V, G466E, G466V, G469R, G469E, G469A, G469V, V471F, V472S, L485W, N581S, I582M, I592M, I592V, D594N, D594G, D594V, D594E, F595L, F595S, G596R, L597V, L597S, L597Q, L597R, A598V, V600M, V600L, V600K, V600R, V600E, V600A, V600G, V600D, K601E, K601N, R603*, W604R, W604G, S605G, S605F, S605N, G606E, G606A, G606V, H608R, H608L, G615R, S616P, S616F, L618S, L618W | NM_004333        |
| <i>BRCC3</i>     | Frameshift/nonsense/splice-site                                                                                                                                                                                                                                                                                                                                                   | NM_024332        |
| <i>CBL</i>       | RING finger missense p.381-421                                                                                                                                                                                                                                                                                                                                                    | NM_005188        |
| <i>CBLB</i>      | RING finger missense p.372-412                                                                                                                                                                                                                                                                                                                                                    | NM_170662        |
| <i>CEBPA</i>     | Frameshift/nonsense/splice-site                                                                                                                                                                                                                                                                                                                                                   | NM_004364        |
| <i>CREBBP</i>    | Frameshift/nonsense/splice-site, D1435E, R1446L, R1446H, R1446C, Y1450C, P1476R, Y1482H, H1487Y, W1502C, Y1503D, Y1503H, Y1503F, S1680del                                                                                                                                                                                                                                         | NM_004380        |
| <i>CSF1R</i>     | L301F, L301S, Y969C, Y969N, Y969F, Y969H, Y969D                                                                                                                                                                                                                                                                                                                                   | NM_005211        |
| <i>CSF3R</i>     | T615A, T618I, truncating c.741-791                                                                                                                                                                                                                                                                                                                                                | NM_000760        |
| <i>CTCF</i>      | Frameshift/nonsense, R377C, R377H, P378A, P378L                                                                                                                                                                                                                                                                                                                                   | NM_006565        |
| <i>CUX1</i>      | Frameshift/nonsense                                                                                                                                                                                                                                                                                                                                                               | NM_181552        |
| <i>DNMT3A</i>    | Frameshift/nonsense/splice-site, F290I, F290C, V296M, P307S, P307R, R326H, R326L, R326C, R326S, G332R, G332E, V339A, V339M, V339G, L344Q, L344P, R366P, R366H, R366G, A368T, A368V, R379H, R379C, I407T, I407N, I407S, F414L,                                                                                                                                                     | NM_022552        |

|              |                                                                                                                                                                                                                                                                                                                                                                                                                                                                                                                                                                                                                                                                                                                                                                                                                                                                                                                                                                                                                                                                                                                                                                                                                                                                                                                                                                                                                                                                                                             |           |
|--------------|-------------------------------------------------------------------------------------------------------------------------------------------------------------------------------------------------------------------------------------------------------------------------------------------------------------------------------------------------------------------------------------------------------------------------------------------------------------------------------------------------------------------------------------------------------------------------------------------------------------------------------------------------------------------------------------------------------------------------------------------------------------------------------------------------------------------------------------------------------------------------------------------------------------------------------------------------------------------------------------------------------------------------------------------------------------------------------------------------------------------------------------------------------------------------------------------------------------------------------------------------------------------------------------------------------------------------------------------------------------------------------------------------------------------------------------------------------------------------------------------------------------|-----------|
|              | F414S, F414C, A462V, K468R, C497G, C497Y, Q527H, Q527P, Y533C, S535F, C537G, C537R, G543A, G543S, G543C, L547H, L547P, L547F, M548I, M548K, G550R, W581R, W581G, W581C, R604Q, R604W, R635W, R635Q, S638F, G646V, G646E, L653W, L653F, I655N, V657A, V657M, R659H, Y660C, V665G, V665L, M674V, R676W, R676Q, G685R, G685E, G685A, D686Y, D686G, R688H, G699R, G699S, G699D, P700L, P700S, P700R, P700Q, P700T, P700A, D702N, D702Y, V704M, V704G, I705F, I705T, I705S, I705N, G707D, G707V, C710S, C710Y, S714C, V716D, V716F, V716I, N717S, N717I, P718L, R720H, R720G, K721R, K721T, Y724C, R729Q, R729W, R729G, F731C, F731L, F731Y, F731I, F732del, F732C, F732S, F732L, E733G, E733A, F734L, F734C, Y735C, Y735N, Y735S, R736H, R736C, R736P, L737H, L737V, L737F, L737R, A741V, P742P, P743R, P743L, R749C, R749L, R749H, R749G, F751L, F751C, F752del, F752C, F752L, F752I, F752V, W753G, W753C, W753R, L754P, L754R, L754H, F755S, F755I, F755L, M761I, M761V, G762C, V763I, S770L, S770W, S770P, R771Q, F772I, F772V, L773R, L773V, E774K, E774D, E774G, I780T, D781G, R792H, W795C, W795L, G796D, G796V, N797Y, N797H, N797S, P799S, P799R, P799H, R803S, R803W, P804L, P804S, K826R, S828N, K829R, T835M, N838D, K841Q, Q842E, P849L, D857N, W860R, E863D, F868S, G869S, G869V, M880V, S881R, S881I, R882H, R882P, R882C, R882G, A884P, A884V, Q886R, L889P, L889R, G890D, G890R, G890S, V895M, P896L, V897G, V897D, R899L, R899H, R899C, L901R, L901H, P904L, F909C, P904Q, A910P, C911R, C911Y |           |
| <i>EED</i>   | Frameshift/nonsense/splice-site, L240Q, I363M                                                                                                                                                                                                                                                                                                                                                                                                                                                                                                                                                                                                                                                                                                                                                                                                                                                                                                                                                                                                                                                                                                                                                                                                                                                                                                                                                                                                                                                               | NM_003797 |
| <i>EP300</i> | Frameshift/nonsense/splice_site, VF1148_1149del, D1399N, D1399Y, P1452L, Y1467N, Y1467H, Y1467C, R1627W, A1629V                                                                                                                                                                                                                                                                                                                                                                                                                                                                                                                                                                                                                                                                                                                                                                                                                                                                                                                                                                                                                                                                                                                                                                                                                                                                                                                                                                                             | NM_001429 |
| <i>ETNK1</i> | N244S, N244T, N244K                                                                                                                                                                                                                                                                                                                                                                                                                                                                                                                                                                                                                                                                                                                                                                                                                                                                                                                                                                                                                                                                                                                                                                                                                                                                                                                                                                                                                                                                                         | NM_018638 |
| <i>ETV6</i>  | Frameshift/nonsense/splice-site                                                                                                                                                                                                                                                                                                                                                                                                                                                                                                                                                                                                                                                                                                                                                                                                                                                                                                                                                                                                                                                                                                                                                                                                                                                                                                                                                                                                                                                                             | NM_001987 |

|              |                                                                                                                                                                                                                                                                                                                                      |              |
|--------------|--------------------------------------------------------------------------------------------------------------------------------------------------------------------------------------------------------------------------------------------------------------------------------------------------------------------------------------|--------------|
| <i>EZH2</i>  | Frameshift/nonsense/splice-site, Q62R, N102S, F145S, F145C, F145Y, F145L, G159R, E164D, R202Q, K238E, E244K, R283Q, H292R, P488S, R497Q, R561H, T568I, K629E, Y641N, Y641H, Y641S, Y641C, Y641F, D659Y, D659G, V674M, A677G, A677V, R679C, R679H, R685C, R685H, A687V, N688I, N688K, H689Y, S690P, I708V, I708T, I708M, E720K, E740K | NM_001203247 |
| <i>FLT3</i>  | V579A, V592A, V592I, F594L, FY590-591GD, D835Y, D835H, D835E, del835                                                                                                                                                                                                                                                                 | NM_004119    |
| <i>GATA1</i> | Frameshift/nonsense/splice-site                                                                                                                                                                                                                                                                                                      | NM_002049    |
| <i>GATA2</i> | Frameshift/nonsense/splice-site, R293Q, N317H, A318T, A318V, A318G, G320D, L321P, L321F, L321V, Q328P, R330Q, R361L, L359V, A372T, R384G, R384K                                                                                                                                                                                      | NM_001145661 |
| <i>GATA3</i> | Frameshift/nonsense/splice-site ZNF domain, R276W, R276Q, N286T, L348V,                                                                                                                                                                                                                                                              | NM_001002295 |
| <i>GNA13</i> | I34T, G57S, S62F, M68K, Q134R, Y145F, L152F, E167D, Q169H, R264H, E273K, V322G, V362G, L371F                                                                                                                                                                                                                                         | NM_006572    |
| <i>GNAS</i>  | R201S, R201C, R201H, R201L, Q227K, Q227R, Q227L, Q227H, R374C                                                                                                                                                                                                                                                                        | NM_000516    |
| <i>GNB1</i>  | K57N, K57M, K57E, K57T, I80T, I80N                                                                                                                                                                                                                                                                                                   | NM_002074    |
| <i>IDH1</i>  | R132C, R132G, R132H, R132L, R132P, R132V, V178I                                                                                                                                                                                                                                                                                      | NM_005896    |
| <i>IDH2</i>  | R140W, R140Q, R140L, R140G, R172W, R172G, R172K, R172T, R172M, R172N, R172S                                                                                                                                                                                                                                                          | NM_002168    |
| <i>IKZF1</i> | Frameshift/nonsense                                                                                                                                                                                                                                                                                                                  | NM_006060    |
| <i>IKZF2</i> | Frameshift/nonsense                                                                                                                                                                                                                                                                                                                  | NM_016260    |
| <i>IKZF3</i> | Frameshift/nonsense                                                                                                                                                                                                                                                                                                                  | NM_012481    |
| <i>JAK1</i>  | T478A, T478S, V623A, A634D, L653F, R724H, R724Q, R724P, T782M, L783F                                                                                                                                                                                                                                                                 | NM_002227    |
| <i>JAK2</i>  | N533D, N533Y, N533S, H538R, K539E, K539L, I540T, I540V, V617F, R683S, R683G, del/ins537-539L,                                                                                                                                                                                                                                        | NM_004972    |

|               |                                                                                                                                                                                                                          |              |
|---------------|--------------------------------------------------------------------------------------------------------------------------------------------------------------------------------------------------------------------------|--------------|
|               | del/ins538-539L, del/ins540-543MK, del/ins540-544MK, del/ins541-543K, del542-543, del543-544, ins11546-547                                                                                                               |              |
| <i>JAK3</i>   | M511T, M511I, A572V, A572T, A573V, R657Q, V715I, V715A                                                                                                                                                                   | NM_000215    |
| <i>KDM6A</i>  | Frameshift/nonsense/splice-site, del419                                                                                                                                                                                  | NM_021140    |
| <i>KIT</i>    | ins503, V559A, V559D, V559G, V559I, V560D, V560A, V560G, V560E, del560, E561K, del579, P627L, P627T, R634W, K642E, K642Q, V654A, V654E, H697Y, H697D, E761D, K807R, D816H, D816Y, D816F, D816I, D816V, D816H, del551-559 | NM_000222    |
| <i>KRAS</i>   | G12D, G12A, G12E, G12V, G13D, G13C, G13Y, G13F, G13R, G13A, G13V, G13E, V14I, T58I, G60D, G60A, G60V, Q61K, Q61E, Q61P, Q61R, Q61L, Q61H, K117E, K117N, A146T, A146P, A146V                                              | NM_033360    |
| <i>LUC7L2</i> | Frameshift/nonsense/splice-site                                                                                                                                                                                          | NM_016019    |
| <i>MLL</i>    | Frameshift/nonsense                                                                                                                                                                                                      | NM_005933    |
| <i>MLL2</i>   | Frameshift/nonsense                                                                                                                                                                                                      | NM_003482    |
| <i>MPL</i>    | S505G, S505N, S505C, L510P, del513, W515A, W515R, W515K, W515S, W515L, A519T, A519V, Y591D, W515-518KT                                                                                                                   | NM_005373    |
| <i>NF1</i>    | Frameshift/nonsense                                                                                                                                                                                                      | NM_000267    |
| <i>NPM1</i>   | Frameshift p.W288fs (insertion at c.859_860, 860_861, 862_863, 863_864)                                                                                                                                                  | NM_002520    |
| <i>NRAS</i>   | G12S, G12R, G12C, G12N, G12P, G12Y, G12D, G12A, G12V, G12E, G13S, G13R, G13C, G13N, G13P, G13Y, G13D, G13A, G13V, G13E, G60E, G60R, Q61R, Q61L, Q61K, Q61P, Q61H, Q61Q                                                   | NM_002524    |
| <i>PDS5B</i>  | Frameshift/nonsense/splice-site, R1292Q                                                                                                                                                                                  | NM_015032    |
| <i>PDSS2</i>  | Frameshift/nonsense                                                                                                                                                                                                      | NM_020381    |
| <i>PHF6</i>   | Frameshift/nonsense/splice-site, A40D, M125I, S246Y, F263L, R274Q, C297Y, H302Y, H329L                                                                                                                                   | NM_001015877 |

|                |                                                                                                                                                                                                                                                                                                                                                                                                                                                   |              |
|----------------|---------------------------------------------------------------------------------------------------------------------------------------------------------------------------------------------------------------------------------------------------------------------------------------------------------------------------------------------------------------------------------------------------------------------------------------------------|--------------|
| <i>PHIP</i>    | Frameshift/nonsense/splice-site                                                                                                                                                                                                                                                                                                                                                                                                                   | NM_017934    |
| <i>PPM1D</i>   | Frameshift/nonsense, exon 5 or 6                                                                                                                                                                                                                                                                                                                                                                                                                  | NM_003620    |
| <i>PRPF40B</i> | Frameshift/nonsense/splice-site, P15H, M58I, P405L, P562S,                                                                                                                                                                                                                                                                                                                                                                                        | NM_001031698 |
| <i>PRPF8</i>   | M1307I, C1594W, D1598Y, D1598N, D1598V                                                                                                                                                                                                                                                                                                                                                                                                            | NM_006445    |
| <i>PTEN</i>    | Frameshift/nonsense/splice-site, D24G, R47G, F56V, L57W, H61R, K66N, Y68H, C71Y, F81C, Y88C, D92G, D92V, D92E, H93Y, H93D, H93Q, N94I, P95L, I101T, C105F, C105S, D107Y, L112V, H123Y, C124R, C124S, K125E, A126D, K128N, R130G, R130Q, R130L, G132D, I135V, I135K, C136R, C136F, K144Q, A151T, D153Y, D153N, Y155H, Y155C, R159K, R159S, R161K, R161I, G165R, G165E, S170N, S170I, R173C, Y174D, Y177C, H196Y, R234W, G251C, D252Y, F271S, D326G | NM_000314    |
| <i>PTPN11</i>  | G60V, G60R, G60A, D61Y, D61V, D61G, Y63C, E69K, E69G, E69D, E69Q, F71L, F71K, A72T, A72V, A72D, T73I, E76K, E76Q, E76M, E76A, E76G, E139G, E139D, N308D, N308T, N339S, P491L, S502P, S502A, S502L, G503V, G503G, G503A, G503E, Q506P, T507A, T507K                                                                                                                                                                                                | NM_002834    |
| <i>RAD21</i>   | Frameshift/nonsense/splice-site, R65Q, H208R, Q474R                                                                                                                                                                                                                                                                                                                                                                                               | NM_006265    |
| <i>RUNX1</i>   | Frameshift/nonsense/splice-site, S73F, H78Q, H78L, R80C, R80P, R80H, L85Q, P86L, P86H, S114L, D133Y, L134P, R135G, R135K, R135S, R139Q, R142S, A165V, R174Q, R177L, R177Q, A224T, D171G, D171V, D171N, R205W, R223C                                                                                                                                                                                                                               | NM_001001890 |
| <i>SETBP1</i>  | D868N, D868T, S869N, G870S, I871T, D880N, D880Q                                                                                                                                                                                                                                                                                                                                                                                                   | NM_015559    |
| <i>SETD2</i>   | Frameshift/nonsense, V1190M                                                                                                                                                                                                                                                                                                                                                                                                                       | NM_014159    |
| <i>SETDB1</i>  | Frameshift/nonsense, K715E                                                                                                                                                                                                                                                                                                                                                                                                                        | NM_001145415 |
| <i>SF1</i>     | Frameshift/nonsense/splice-site, T454M, Y476C, A508G                                                                                                                                                                                                                                                                                                                                                                                              | NM_004630    |
| <i>SF3A1</i>   | Frameshift/nonsense/splice-site, A57S, M117I, K166T, Y271C                                                                                                                                                                                                                                                                                                                                                                                        | NM_005877    |

|              |                                                                                                                                                                                                                                                                                                                                                                                                                                                                                                                                                                                                                                                                                                                                                                                                                                                                                                                                                                                                                                                     |              |
|--------------|-----------------------------------------------------------------------------------------------------------------------------------------------------------------------------------------------------------------------------------------------------------------------------------------------------------------------------------------------------------------------------------------------------------------------------------------------------------------------------------------------------------------------------------------------------------------------------------------------------------------------------------------------------------------------------------------------------------------------------------------------------------------------------------------------------------------------------------------------------------------------------------------------------------------------------------------------------------------------------------------------------------------------------------------------------|--------------|
| <i>SF3B1</i> | G347V, R387W, R387Q, E592K, E622D, Y623C, R625L, R625C, R625G, H662Q, H662D, T663I, K666N, K666T, K666E, K666R, K700E, V701F, A708T, G740R, G740E, A744P, D781G, E783K, R831Q, L833F, E862K, R957Q                                                                                                                                                                                                                                                                                                                                                                                                                                                                                                                                                                                                                                                                                                                                                                                                                                                  | NM_012433    |
| <i>SRSF2</i> | Y44H, P95H, P95L, P95T, P95R, P95A, P107H, P95fs                                                                                                                                                                                                                                                                                                                                                                                                                                                                                                                                                                                                                                                                                                                                                                                                                                                                                                                                                                                                    | NM_003016    |
| <i>SMC1A</i> | K190T, R586W, M689V, R807H, R1090H, R1090C                                                                                                                                                                                                                                                                                                                                                                                                                                                                                                                                                                                                                                                                                                                                                                                                                                                                                                                                                                                                          | NM_006306    |
| <i>SMC3</i>  | Frameshift/nonsense, R155I, Q367E, D392V, K571R, R661P, G662C                                                                                                                                                                                                                                                                                                                                                                                                                                                                                                                                                                                                                                                                                                                                                                                                                                                                                                                                                                                       | NM_005445    |
| <i>STAG1</i> | Frameshift/nonsense/splice-site, H1085Y                                                                                                                                                                                                                                                                                                                                                                                                                                                                                                                                                                                                                                                                                                                                                                                                                                                                                                                                                                                                             | NM_005862    |
| <i>STAG2</i> | Frameshift/nonsense/splice-site                                                                                                                                                                                                                                                                                                                                                                                                                                                                                                                                                                                                                                                                                                                                                                                                                                                                                                                                                                                                                     | NM_006603    |
| <i>SUZ12</i> | Frameshift/nonsense                                                                                                                                                                                                                                                                                                                                                                                                                                                                                                                                                                                                                                                                                                                                                                                                                                                                                                                                                                                                                                 | NM_015355    |
| <i>TET2</i>  | Frameshift/nonsense/splice-site, missense mutations in catalytic domains (p.1104-1481 and 1843-2002)                                                                                                                                                                                                                                                                                                                                                                                                                                                                                                                                                                                                                                                                                                                                                                                                                                                                                                                                                | NM_001127208 |
| <i>TP53</i>  | Frameshift/nonsense/splice-site, S46F, G105C, G105R, G105D, G108S, G108C, R110L, R110C, T118A, T118R, T118I, S127F, S127Y, L130V, L130F, K132Q, K132E, K132W, K132R, K132M, K132N, F134V, F134L, F134S, C135W, C135S, C135F, C135G, C135Y, Q136K, Q136E, Q136P, Q136R, Q136L, Q136H, A138P, A138V, A138A, A138T, T140I, C141R, C141G, C141A, C141Y, C141S, C141F, C141W, V143M, V143A, V143E, L145Q, W146C, W146L, L145R, V147G, P151T, P151A, P151S, P151H, P151R, P152S, P152R, P152L, T155P, T155A, V157F, R158H, R158L, A159V, A159P, A159S, A159D, A161T, A161D, Y163N, Y163H, Y163D, Y163S, Y163C, K164E, K164M, K164N, K164P, H168Y, H168P, H168R, H168L, H168Q, M169I, M169T, M169V, E171K, E171Q, E171G, E171A, E171V, E171D, V172D, V173M, V173L, V173G, R174W, R175G, R175C, R175H, C176R, C176G, C176Y, C176F, C176S, P177R, P177R, P177L, H178D, H178P, H178Q, H179Y, H179R, H179Q, R181C, R181Y, D186G, G187S, P190L, P190T, H193N, H193P, H193L, H193R, L194F, L194R, I195F, I195N, I195T, R196P, V197L, G199V, Y205N, Y205C, Y205H, | NM_001126112 |

|              |                                                                                                                                                                                                                                                                                                                                                                                                                                                                                                                                                                                                                                                                                                                                                                                                                                                                                                                                                                                                                                  |           |
|--------------|----------------------------------------------------------------------------------------------------------------------------------------------------------------------------------------------------------------------------------------------------------------------------------------------------------------------------------------------------------------------------------------------------------------------------------------------------------------------------------------------------------------------------------------------------------------------------------------------------------------------------------------------------------------------------------------------------------------------------------------------------------------------------------------------------------------------------------------------------------------------------------------------------------------------------------------------------------------------------------------------------------------------------------|-----------|
|              | D208V, R213Q, R213P, R213L, R213Q, H214D, H214R, S215G, S215I, S215R, V216M, V217G, Y220N, Y220H, Y220S, Y220C, E224D, I232F, I232N, I232T, I232S, Y234N, Y234H, Y234S, Y234C, Y236N, Y236H, Y236C, M237V, M237K, M237I, C238R, C238G, C238Y, C238W, N239T, N239S, S241Y, S241C, S241F, C242G, C242Y, C242S, C242F, G244S, G244C, G244D, G245S, G245R, G245C, G245D, G245A, G245V, G245S, M246V, M246K, M246R, M246I, N247I, R248W, R248G, R248Q, R249G, R249W, R249T, R249M, P250L, I251N, L252P, I254S, I255F, I255N, I255S, L257Q, L257P, E258K, E258Q, D259Y, S261T, G262D, G262V, L265P, G266R, G266E, G266V, R267W, R267Q, R267P, E271K, V272M, V272L, R273S, R273G, R273C, R273H, R273P, R273L, V274F, V274D, V274A, V274G, V274L, C275Y, C275S, C275F, A276P, C277F, C277Y, P278T, P278A, P278S, P278H, P278R, P278L, G279E, R280G, R280K, R280T, R280I, R280S, D281N, D281H, D281Y, D281G, D281E, R282G, R282W, R282Q, R282P, E285K, E285V, E286G, E286V, E286K, K320N, L330R, G334V, R337C, R337L, A347T, L348F, T377P |           |
| <i>U2AF1</i> | D14G, S34F, S34Y, R35L, R156H, R156Q, Q157R, Q157P                                                                                                                                                                                                                                                                                                                                                                                                                                                                                                                                                                                                                                                                                                                                                                                                                                                                                                                                                                               | NM_006758 |
| <i>U2AF2</i> | R18W, Q143L, M144I, L187V, Q190L                                                                                                                                                                                                                                                                                                                                                                                                                                                                                                                                                                                                                                                                                                                                                                                                                                                                                                                                                                                                 | NM_007279 |
| <i>WT1</i>   | Frameshift/nonsense/splice-site                                                                                                                                                                                                                                                                                                                                                                                                                                                                                                                                                                                                                                                                                                                                                                                                                                                                                                                                                                                                  | NM_024426 |
| <i>ZRSR2</i> | Frameshift/nonsense, R126P, E133G, C181F, H191Y, I202N, F239V, F239Y, N261Y, C280R, C302R, C326R, H330R, N382K                                                                                                                                                                                                                                                                                                                                                                                                                                                                                                                                                                                                                                                                                                                                                                                                                                                                                                                   | NM_005089 |

**Supplementary Table 13. STROBE-MR guidelines checklist.**

| Item No. | Section                              | Checklist item                                                                                                                                                                                                                            | Page No.                     | Comment                                                                                                                                     |
|----------|--------------------------------------|-------------------------------------------------------------------------------------------------------------------------------------------------------------------------------------------------------------------------------------------|------------------------------|---------------------------------------------------------------------------------------------------------------------------------------------|
| 1        | <b>TITLE and ABSTRACT</b>            | Indicate Mendelian randomization (MR) as the study's design in the title and/or the abstract if that is a main purpose of the study                                                                                                       | 3                            | <b>As MR is one of several analyses in the study, we have not included it in the study title. However, it is described in the abstract.</b> |
|          | <b>INTRODUCTION</b>                  |                                                                                                                                                                                                                                           |                              |                                                                                                                                             |
| 2        | <b>Background</b>                    | Explain the scientific background and rationale for the reported study. What is the exposure? Is a potential causal relationship between exposure and outcome plausible? Justify why MR is a helpful method to address the study question | 4                            |                                                                                                                                             |
| 3        | <b>Objectives</b>                    | State specific objectives clearly, including pre-specified causal hypotheses (if any). State that MR is a method that, under specific assumptions, intends to estimate causal effects                                                     | 26                           |                                                                                                                                             |
|          | <b>METHODS</b>                       |                                                                                                                                                                                                                                           |                              |                                                                                                                                             |
| 4        | <b>Study design and data sources</b> | Present key elements of the study design early in the article. Consider including a table listing sources of data for all phases of the study. For each data source contributing to the analysis, describe the following:                 | <b>Table 1</b>               |                                                                                                                                             |
|          |                                      | a) Setting: Describe the study design and the underlying population, if possible. Describe the setting, locations, and relevant dates, including periods of recruitment, exposure, follow-up, and data collection, when available.        | <b>Table 1</b>               |                                                                                                                                             |
|          |                                      | b) Participants: Give the eligibility criteria, and the sources and methods of selection of participants. Report the sample size, and whether any power or sample size calculations were carried out prior to the main analysis           | <b>Table 1</b>               |                                                                                                                                             |
|          |                                      | c) Describe measurement, quality control and selection of genetic variants                                                                                                                                                                | <b>26</b>                    |                                                                                                                                             |
|          |                                      | d) For each exposure, outcome, and other relevant variables, describe methods of assessment and diagnostic criteria for diseases                                                                                                          | <b>22-23, Supp Table 1,3</b> |                                                                                                                                             |
|          |                                      | e) Provide details of ethics committee approval and participant informed consent, if relevant                                                                                                                                             | <b>24</b>                    |                                                                                                                                             |
| 5        | <b>Assumptions</b>                   | Explicitly state the three core IV assumptions for the main analysis (relevance, independence                                                                                                                                             | <b>26</b>                    |                                                                                                                                             |

|           |                                                     |                                                                                                                                                                                                                                      |                |  |
|-----------|-----------------------------------------------------|--------------------------------------------------------------------------------------------------------------------------------------------------------------------------------------------------------------------------------------|----------------|--|
|           |                                                     | and exclusion restriction) as well assumptions for any additional or sensitivity analysis                                                                                                                                            |                |  |
| <b>6</b>  | <b>Statistical methods: main analysis</b>           | Describe statistical methods and statistics used                                                                                                                                                                                     | <b>26</b>      |  |
|           | a)                                                  | Describe how quantitative variables were handled in the analyses (i.e., scale, units, model)                                                                                                                                         | <b>7</b>       |  |
|           | b)                                                  | Describe how genetic variants were handled in the analyses and, if applicable, how their weights were selected                                                                                                                       | <b>7</b>       |  |
|           | c)                                                  | Describe the MR estimator (e.g. two-stage least squares, Wald ratio) and related statistics. Detail the included covariates and, in case of two-sample MR, whether the same covariate set was used for adjustment in the two samples | <b>7</b>       |  |
|           | d)                                                  | Explain how missing data were addressed                                                                                                                                                                                              | <b>7</b>       |  |
|           | e)                                                  | If applicable, indicate how multiple testing was addressed                                                                                                                                                                           | <b>NA</b>      |  |
| <b>7</b>  | <b>Assessment of assumptions</b>                    | Describe any methods or prior knowledge used to assess the assumptions or justify their validity                                                                                                                                     | <b>7</b>       |  |
| <b>8</b>  | <b>Sensitivity analyses and additional analyses</b> | Describe any sensitivity analyses or additional analyses performed (e.g. comparison of effect estimates from different approaches, independent replication, bias analytic techniques, validation of instruments, simulations)        | <b>7</b>       |  |
| <b>9</b>  | <b>Software and pre-registration</b>                |                                                                                                                                                                                                                                      |                |  |
|           | a)                                                  | Name statistical software and package(s), including version and settings used                                                                                                                                                        | <b>27</b>      |  |
|           | b)                                                  | State whether the study protocol and details were pre-registered (as well as when and where)                                                                                                                                         | <b>NA</b>      |  |
|           | <b>RESULTS</b>                                      |                                                                                                                                                                                                                                      |                |  |
| <b>10</b> | <b>Descriptive data</b>                             |                                                                                                                                                                                                                                      |                |  |
|           | a)                                                  | Report the numbers of individuals at each stage of included studies and reasons for exclusion. Consider use of a flow diagram                                                                                                        | <b>Table 1</b> |  |
|           | b)                                                  | Report summary statistics for phenotypic exposure(s), outcome(s), and other relevant variables (e.g. means, SDs, proportions)                                                                                                        | <b>Table 1</b> |  |

|           |                                                     |                                                                                                                                                                                                                                                                        |                 |  |
|-----------|-----------------------------------------------------|------------------------------------------------------------------------------------------------------------------------------------------------------------------------------------------------------------------------------------------------------------------------|-----------------|--|
|           |                                                     | c) If the data sources include meta-analyses of previous studies, provide the assessments of heterogeneity across these studies                                                                                                                                        | NA              |  |
|           |                                                     | d) For two-sample MR:<br>i. Provide justification of the similarity of the genetic variant-exposure associations between the exposure and outcome samples<br>ii. Provide information on the number of individuals who overlap between the exposure and outcome studies | 27              |  |
| <b>11</b> | <b>Main results</b>                                 |                                                                                                                                                                                                                                                                        |                 |  |
|           |                                                     | a) Report the associations between genetic variant and exposure, and between genetic variant and outcome, preferably on an interpretable scale                                                                                                                         | Supp Table 6    |  |
|           |                                                     | b) Report MR estimates of the relationship between exposure and outcome, and the measures of uncertainty from the MR analysis, on an interpretable scale, such as odds ratio or relative risk per SD difference                                                        | 7               |  |
|           |                                                     | c) If relevant, consider translating estimates of relative risk into absolute risk for a meaningful time period                                                                                                                                                        | Extended Fig 2  |  |
|           |                                                     | d) Consider plots to visualize results (e.g. forest plot, scatterplot of associations between genetic variants and outcome versus between genetic variants and exposure)                                                                                               | Extended Fig 4A |  |
| <b>12</b> | <b>Assessment of assumptions</b>                    |                                                                                                                                                                                                                                                                        |                 |  |
|           |                                                     | a) Report the assessment of the validity of the assumptions                                                                                                                                                                                                            | 7               |  |
|           |                                                     | b) Report any additional statistics (e.g., assessments of heterogeneity across genetic variants, such as $I^2$ , Q statistic or E-value)                                                                                                                               | 7               |  |
| <b>13</b> | <b>Sensitivity analyses and additional analyses</b> |                                                                                                                                                                                                                                                                        |                 |  |
|           |                                                     | a) Report any sensitivity analyses to assess the robustness of the main results to violations of the assumptions                                                                                                                                                       | 7               |  |
|           |                                                     | b) Report results from other sensitivity analyses or additional analyses                                                                                                                                                                                               | 7               |  |
|           |                                                     | c) Report any assessment of direction of causal relationship (e.g., bidirectional MR)                                                                                                                                                                                  | 7               |  |

|    |                              |                                                                                                                                                                                                                                                                                                                                                      |    |  |
|----|------------------------------|------------------------------------------------------------------------------------------------------------------------------------------------------------------------------------------------------------------------------------------------------------------------------------------------------------------------------------------------------|----|--|
|    | d)                           | When relevant, report and compare with estimates from non-MR analyses                                                                                                                                                                                                                                                                                | 7  |  |
|    | e)                           | Consider additional plots to visualize results (e.g., leave-one-out analyses)                                                                                                                                                                                                                                                                        | 7  |  |
|    | <b>DISCUSSION</b>            |                                                                                                                                                                                                                                                                                                                                                      |    |  |
| 14 | <b>Key results</b>           | Summarize key results with reference to study objectives                                                                                                                                                                                                                                                                                             | 10 |  |
| 15 | <b>Limitations</b>           | Discuss limitations of the study, taking into account the validity of the IV assumptions, other sources of potential bias, and imprecision. Discuss both direction and magnitude of any potential bias and any efforts to address them                                                                                                               | 10 |  |
| 16 | <b>Interpretation</b>        |                                                                                                                                                                                                                                                                                                                                                      |    |  |
|    | a)                           | Meaning: Give a cautious overall interpretation of results in the context of their limitations and in comparison with other studies                                                                                                                                                                                                                  | 10 |  |
|    | b)                           | Mechanism: Discuss underlying biological mechanisms that could drive a potential causal relationship between the investigated exposure and the outcome, and whether the gene-environment equivalence assumption is reasonable. Use causal language carefully, clarifying that IV estimates may provide causal effects only under certain assumptions | 10 |  |
|    | c)                           | Clinical relevance: Discuss whether the results have clinical or public policy relevance, and to what extent they inform effect sizes of possible interventions                                                                                                                                                                                      | 10 |  |
| 17 | <b>Generalizability</b>      | Discuss the generalizability of the study results (a) to other populations, (b) across other exposure periods/timings, and (c) across other levels of exposure                                                                                                                                                                                       | 10 |  |
|    | <b>OTHER</b>                 |                                                                                                                                                                                                                                                                                                                                                      |    |  |
| 18 | <b>Funding</b>               | Describe sources of funding and the role of funders in the present study and, if applicable, sources of funding for the databases and original study or studies on which the present study is based                                                                                                                                                  | 28 |  |
| 19 | <b>Data and data sharing</b> | Provide the data used to perform all analyses or report where and how the data can be accessed, and reference these sources in the article. Provide the statistical code needed to reproduce the results in the article, or report whether the code is publicly accessible and if so, where                                                          | 28 |  |
| 20 | <b>Conflicts of Interest</b> | All authors should declare all potential conflicts of interest                                                                                                                                                                                                                                                                                       | 29 |  |

**Supplementary Table 14. TOPMed Omics Support Table.**

| <b>TOPMed Accession</b> | <b>TOPMed Project</b> | <b>Parent Study</b> | <b>TOPMed Phase</b> | <b>Omics Center</b>    | <b>Omics Support</b> | <b>Omics Type</b> |
|-------------------------|-----------------------|---------------------|---------------------|------------------------|----------------------|-------------------|
| phs000974               | AFGen                 | FHS<br>AFGen        | 1                   | Broad Genomics         | 3R01HL092577-06S1    | WGS               |
| phs000974               | FHS                   | FHS                 | pilot; 4.5          | NWGC                   | HHSN268201600032I    | RNASeq            |
| phs000974               | FHS                   | FHS                 | 5                   | NWGC                   | HHSN268201600032I    | RNASeq            |
| phs000974               | FHS                   | FHS                 | pilot; 4.5          | Broad BIDMC Proteomics | HHSN268201600034I    | Proteomics        |
| phs000974               | FHS                   | FHS                 | 5                   | Broad Metabolomics     | HHSN268201600034I    | Metabolomics      |
| phs000974               | FHS                   | FHS                 | 5                   | Keck MGC               | HHSN268201600038I    | Methylomics       |
| phs000974               | FHS                   | FHS                 | 1                   | Broad Genomics         | 3U54HG003067-12S2    | WGS               |
